# Supplementary material for: Isotopic constraints on the role of hypohalous acids in sulfate aerosolformation in the remote marine boundary layer
Source: Copernicus journal article supplement (doi:10.5194/acp-16-11433-2016), 2016-09-14
Supplement: Supplementary file 1 [file acp-16-11433-2016-supplement.zip]

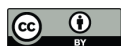

*Supplement of*

## **Isotopic constraints on the role of hypohalous acids in sulfate aerosol formation in the remote marine boundary layer**

**Qianjie Chen et al.**

*Correspondence to:* Becky Alexander ([beckya@atmos.washington.edu](mailto:beckya@atmos.washington.edu))

- [acp-16-11433-2016-supplement-title-page.pdf](#)
- [Supplementary data sample information.xlsx](#)
- [\\_\\_MACOSX](#)
  - [\\_Supplementary data sample information.xlsx](#)

The copyright of individual parts of the supplement might differ from the CC-BY 3.0 licence.
