# Supplementary material for: Isotopic constraints on the role of hypohalous acids in sulfate aerosolformation in the remote marine boundary layer
Source: Copernicus journal article supplement (doi:10.5194/acp-16-11433-2016), 2016-09-14
Supplement: Supplementary file 1 [file Supplementary data sample infomation.xlsx]

## Sheet: Sheet1
Sample #	lat	lon	Date	SO4 measured (ug/m3)	D17O measured (‰)	D17O err (‰)	fnss	nssSO4 (ug/m3)	nss-D17O (‰)	max O3 contribution	min O3 contribution	K+（ug/m3)	Na+（ug/m3)	Ca2+（ug/m3)	Mg2+（ug/m3)	Cl-（ug/m3)	NO3-（ug/m3)	NO2-（ug/m3)	Br-（ug/m3)	fobsHOX (standard)	fobsHOX (low pH)	[HOX]aq(standard) (M)	[HOX]aq(noHOBrnoSR) (M)	[HOX]g(standard) (ppt)	[HOX]g(noHOBrnoSR) (ppt)
MH19	-3.0295	-27.3257	2011-01-03	1.67202	0.63277	0.0753364	0.441434	0.738086	1.43344	0.229351	0.126456	1.43892	3.54366	0.535704	0.441449	5.75222	0.739912			0	0	0	0	0	0
MH20	-4.77867	-28.1687	2011-01-06	0.514165	0.204359	0	0.837588	0.430658	0.243985	0.0390375	0	7.94688	14.3989	0.501411	0.232777	9.3207	0.0883159			0.777399	0.789156	5.33849e-10	5.59325e-10	0.547538	0.573667
MH27	-21.0933	-35.9723	2011-01-11	7.48006	0.339542	0.0981519	0.389245	2.91158	0.872311	0.13957	0.0297087	36.7144	43.1017	2.23573	2.41561	49.2324	0.569763			0.338286	0.37357	8.81115e-11	9.70308e-11	0.0903708	0.0995187
MH36	-24.315	-36.2222	2011-01-19	0.613988	0.612438	0	0.450909	0.276853	1.35823	0.217317	0.113488	11.8292	23.8253	0.550978	0.714147	12.1736	0.197727			0	0	0	0	0	0
MH39	-25.8625	-27.6022	2011-01-21	1.34871	0.153309	0.100773	0.341618	0.460742	0.448775	0.071804	0	1.45344	4.53885	0.695128	0.390571	4.36409	0.0542249			0.700479	0.701947	2.62736e-10	2.63219e-10	0.269473	0.269969
MH40	-26.4653	-24.2097	2011-01-23	1.71546	0.145079	0.0577471	0.788999	1.3535	0.183877	0.0294203	0	14.4161	27.8335	0.406935	0.360426	37.2133	0.215548			0.891526	0.882383	9.76888e-10	8.89698e-10	1.00194	0.912511
MH41	-26.9468	-21.3998	2011-01-24	1.10659	0.267944	0.0676584	0.629917	0.697061	0.425365	0.0680584	0	5.52506	2.53162	0.35077	0.216862	3.25796	0.164151			0.669185	0.597615	2.83825e-10	2.10082e-10	0.291102	0.215469
MH42	-27.5533	-18.0893	2011-01-26	1.07761	0.512817	0.0493013	0.885349	0.954062	0.579226	0.0926762	0	8.32283	7.03744	0.47044	0.187999	9.34383	0.224388			0.367268	0.257759	9.69886e-11	5.89144e-11	0.0994755	0.060425
MH44	-28.649	-11.8117	2011-01-28	1.52333	0.427433	0.122851	0.398648	0.607271	1.07221	0.171553	0.0641736	4.86543	2.92971	0.990707	0.414005	3.35277	0.167034			0.0913269	0.0514884	1.05451e-11	5.67685e-12	0.0108155	0.00582241
MH46	-29.7673	-5.31483	2011-01-30	1.27954	0.646847	0.0501564	0.529752	0.677839	1.22104	0.195366	0.0898339	2.17962	1.88624	1.02609	0.270816	1.69621	0.151585			0	0	0	0	0	0
MH47	-30.2617	-2.43533	2011-01-31	0.706037	0.632855	0	0.709072	0.500631	0.892511	0.142802	0.0331915	2.00075	2.94663	0.376862	0.111161	3.88488	0			0	0	4.44587e-12	0	0.00455987	0
MH48	-30.8817	0.967833	2011-02-01	0.750853	1.34117	0.278464	0.81424	0.611375	1.64714	0.263542	0.1633	4.33788	3.19793	0.583213	0.220113	3.28301	0			0	0	0	0	0	0
MH50	-31.8323	6.857	2011-02-03	2.00894	0.723079	0.187873	0.908139	1.82439	0.79622	0.127395	0.0165897	2.31067	7.16836	0.532852	0.540639	7.08358	0.488885			0.631222	0.202587	8.81992e-11	1.11439e-11	0.0904607	0.0114297
MH51	-32.2342	9.34517	2011-02-04	1.70017	0.269176	0.0599669	0.415333	0.706136	0.648098	0.103696	0	1.9984	3.67843	0.65029	0.496103	5.41629	0.469621			0.675943	0.431244	1.22077e-10	3.96626e-11	0.125207	0.0406796
MH61	-35.1362	25.5632	2011-02-14	2.92035	0.258239	0.00394925	0.414561	1.21066	0.622921	0.0996673	0	5.04142	14.689	0.756177	0.861996	13.7553	0.802786			0.748522	0.369308	2.19428e-10	3.68139e-11	0.225054	0.0377579
MH63	-34.4397	31.1118	2011-02-16	1.84691	0.290587	0.0560596	0.370438	0.684166	0.784441	0.125511	0.0145588	0.67291	10.3925	0.520584	0.676299	9.71523	0.0537313			0.621626	0.496466	1.46753e-10	8.62111e-11	0.150516	0.0884216
MH69	-32.196	52.1232	2011-02-22	5.88207	0.213253	0.162943	0.307895	1.81106	0.692615	0.110818	0	3.09314	20.4812	1.38637	1.6942	30.1968	0.171226			0.867638	0.710403	3.46953e-10	6.98572e-11	0.355849	0.0716484
MH71	-30.8435	59.7825	2011-02-24	4.35392	0.0310115	0.0280763	0.460082	2.00316	0.0674043	0.0107847	0	12.4921	12.5623	0.897428	1.19599	18.0248	0.059456			0.977709	0.972248	3.33375e-09	2.58496e-09	3.41923	2.65124
MH74	-28.1275	66.4932	2011-02-27	1.67203	0.576766	0.15075	0.496418	0.830027	1.16186	0.185897	0.0796304	7.4262	3.27571	1.08155	0.387936	3.97414	0.0797238			0.166076	0.0779067	1.26176e-11	5.27937e-12	0.0129411	0.00541474
MH75	-29.3535	69.4	2011-02-28	1.07159	0.604448	0.0291053	0.550062	0.589442	1.09887	0.175819	0.0687709	3.06193	17.0375	0.427055	0.234375	19.0029	0			0.523407	0.459081	6.62966e-11	5.04345e-11	0.0679965	0.0517276
MH77	-29.9043	76.0933	2011-03-02	0.581172	0.400465	0.167965	0.512131	0.297636	0.781958	0.125113	0.0141308	1.16153	0.921695	0.470771	0.127745	0.935863	0.0225308			0.555157	0.493872	1.14823e-10	8.87696e-11	0.117767	0.0910458
MH80	-29.7488	86.2565	2011-03-05	1.44554	0.263413	0.207413	0.84829	1.22624	0.310522	0.0496835	0	6.82412	18.8091	0.603175	0.389006	18.4565	0			0.801674	0.787213	2.12252e-10	1.9179e-10	0.217694	0.196708
MH81	-29.6947	89.4985	2011-03-06	1.4576	0.503027	0.144904	0.395967	0.577161	1.27038	0.203261	0.0983411	3.76654	6.56048	0.811778	0.407467	5.43537	0.0470504			0.231806	0.0516735	1.79063e-11	3.11361e-12	0.0183654	0.00319345
MH84	-30.3327	103.308	2011-03-08	0.79981	0.653583	0.00990327	0.457154	0.365636	1.42968	0.228749	0.125807	17.1809	1.64965	1.19479	0.199344	1.52293	0.0866633			0.0785596	0	5.35078e-12	0	0.00548798	0
MH95	-36.6393	120.856	2011-03-20	1.06335	0.73394	0	0.993339	1.05627	0.738861	0.118218	0.00670025	1.87812	3.38924	0.390658	0.0765381	2.84679	0			0.640864	0.545847	8.52421e-11	5.38194e-11	0.0874278	0.0551994
2011-NJ-QF-01	31.2236	124.963	2011-11-05	1.32429	0.692518	0.0136031	0.812831	1.07643	0.851983	0.136317	0.0262039	0.0337938	1.25248	0.0781482	0.112646	2.27024	1.03346	0.0836397	0	0.385874	0	1.2384e-11	0	0.0127015	0
2011-NJ-QF-02	18.5268	125.999	2011-11-07	0.524752	0.542447	0.105294	0.474831	0.249169	1.1424	0.182784	0.0762759	0.0794094	1.34202	0.0916818	0.124889	2.74966	0.943312	0.0810698	0.0211518	0.189684	0.201482	6.39412e-11	6.80309e-11	0.0655807	0.0697753
2011-NJ-QF-03	5.28697	124.835	2011-11-09 12:00:00	1.43648	0.771992	0.44397	0.703544	1.01062	1.09729	0.175566	0.0684984	0.178719	2.25461	0.117619	0.224545	3.99201	1.03168	0.18987	0.309933	0.428322	0.401421	1.22777e-10	1.10828e-10	0.125925	0.11367
2011-NJ-QF-04	-8.4412	117.099	2011-11-12	3.91625	0.317241	0.160812	0.820424	3.21298	0.386679	0.0618686	0	0.236277	3.0716	0.22527	0.301583	3.67462	1.64851	0	0	0.654763	0.657627	7.6105e-10	7.63728e-10	0.780564	0.78331
2011-NJ-QF-06	-23.2743	114.192	2011-11-15	5.25131	0.326675	0.245521	0.389018	2.04285	0.839742	0.134359	0.0240935	0.540091	12.9722	0.758426	1.3452	25.5844	1.63694	0.124321	0.303514	0	0	0	0	0	0
2011-NJ-QF-07	-30.7925	115.208	2011-11-17	2.9636	0.102777	0.123622	0.47451	1.40626	0.216596	0.0346553	0	0.244738	6.42332	0.293544	0.627407	12.388	0.647566	0.0392571	0.164314	0.821782	0.767714	4.7869e-10	3.35519e-10	0.490964	0.344122
2011-NJ-QF-08	-39.8658	112.446	2011-11-21	1.48947	0.0639873	0.266639	0.411355	0.6127	0.155552	0.0248884	0	0.0909566	3.71325	0.121507	0.295088	7.21425	0.7598	0.037077	0.0880404	0.926511	0.881577	6.87636e-10	3.61789e-10	0.705268	0.371066
2011-NJ-QF-09	-51.0573	107.958	2011-11-23	1.02045	0.13367	0.0883834	0.535275	0.546221	0.249722	0.0399555	0	0.0672302	2.11314	0.0593207	0.199713	4.41788	0.636182	0.0440292	0.040404	0.92064	0.825847	3.0217e-10	8.37243e-11	0.309918	0.0858711
2011-NJ-QF-10	-61.4325	89.6078	2011-11-26	1.83528	0.482682	0.0501201	0.351145	0.644451	1.37459	0.219935	0.116309	0.123331	4.94108	0.178145	0.415019	9.59066	0.544093	0.0191848	0.0839174	0	0	0	0	0	0
2011-NJ-QF-11	-67.5506	76.8938	2011-11-29	0.952	1.06191	0.0280873	0.947676	0.902187	1.12054	0.179286	0.0725064	0.0255257	0.457498	0.0229076	0.0366522	0.929	0.63	0.059	0.09	0	0	0	0	0	0
2011-NJ-QF-12	-69.2785	76.3719	2011-12-01	2.03395	0.513303	0.0667904	0.891237	1.81273	0.575944	0.092151	0	0.0467038	1.13127	0.0505958	0.108976	1.82618	0.560446	0.0828344	0.086402	0.366763	0	3.24855e-11	0	0.0333185	0
2011-NJ-QF-13	-69.2821	76.3747	2011-12-05	0.929515	1.04393	0.0440301	0.955253	0.887922	1.09283	0.174853	0.0677295	0.0111713	0.42648	0.0164283	0.0407423	0.814977	0.706813	0.0832588	0.0730075	0	0	0	0	0	0
2011-NJ-QF-14	-69.2785	76.3719	2011-12-09	0.649303	1.2182	0.0919438	1	0.649303	1.2182	0.194911	0.0893442	0.0130553	0.156663	0.00848591	0.0169718	0.417376	0.594275	0.0773524	0.0578348	0	0	0	0	0	0
2011-NJ-QF-15	-69.2785	76.3719	2011-12-13	0.838871	0.705947	0.181034	1	0.838871	0.705947	0.112952	0.00102537	0.00390748	0.203189	0.00325623	0.0227936	0.40996	0.494557	0.0672086	0.0538581	0.31304	0	1.98615e-11	0	0.0203708	0
2011-NJ-QF-16	-67.5664	75.7094	2011-12-17	3.60159	0.326293	0.128407	0.853467	3.07383	0.382315	0.0611704	0	0.0964467	2.3513	0.144338	0.246771	4.36784	0.471857	0.0942517	0.073233	0.475692	0.206552	4.70073e-11	1.31326e-11	0.0482127	0.0134694
2011-NJ-QF-18	-63.6266	59.5092	2011-12-20	1.55346	0.918348	0.135624	0.790518	1.22804	1.1617	0.185873	0.0796042	0.318646	2.25856	0.137655	0.247269	4.85896	1.61184	0.343882	0.16901	0.343243	0	1.05952e-11	0	0.0108669	0
2011-NJ-QF-19	-62.8705	18.6428	2011-12-23	1.28406	0.36132	0.0307329	0.705372	0.905743	0.512241	0.0819586	0	0.0923295	1.75426	0.119002	0.203125	3.89651	1.23099	0.0743424	0.0610059	0.635426	0.271219	2.27493e-11	4.28621e-12	0.0233326	0.00439612
2011-NJ-QF-21	-61.5525	-32.5516	2011-12-29	2.46807	0.588555	0.296282	0.931674	2.29943	0.631718	0.101075	0	0.0369792	0.96146	0.130906	0.0820939	1.52303	0.448262	0.1207	0.0614595	0.684724	0.210816	9.13892e-11	6.35636e-12	0.0937325	0.00651934
2011-NJ-QF-22	-62.1512	-56.0307	2012-01-01	1.76804	0.400343	0.124675	0.716071	1.26604	0.559083	0.0894532	0	0.132934	2.2509	0.156554	0.214299	6.72359	0.157224	0.0196704	0.0793095	0.870705	0.576635	6.16943e-11	4.70758e-12	0.0632762	0.00482829
2011-NJ-QF-23	-62.2724	-58.7023	2012-01-05	2.08125	0.348756	0.0649928	0.773371	1.60958	0.450956	0.072153	0	0.0963577	2.13171	0.143366	0.219263	6.15001	0.167428	0.0283065	0.0661862	0.899253	0.505285	1.61869e-10	6.05579e-12	0.16602	0.00621107
2011-NJ-QF-24	-58.6974	-62.6283	2012-01-08	2.85108	0.535457	0.296363	0.665938	1.89864	0.804064	0.12865	0.0179421	0.216771	4.03167	0.226485	0.410572	11.424	0.256931	0.0234577	0.0630598	0.777716	0.0795714	9.16527e-11	1.12145e-12	0.0940028	0.00115021
2011-NJ-QF-25	-54.8792	-67.6129	2012-01-10	0.81533	0.602368	0.127022	0.825882	0.673366	0.729364	0.116698	0.00506271	0.0764593	0.835011	0.141003	0.0798706	2.44351	0.272036	0.0160855	0.0818448	0.780492	0.596423	9.67265e-11	2.92104e-11	0.0992066	0.0299594
2011-NJ-QF-26	-54.8086	-68.2649	2012-01-13	1.47767	0.183755	0.0330429	0.642033	0.948714	0.286208	0.0457932	0	0.11514	2.35457	0.157643	0.207537	7.0179	0.207766	0.0122547	0.0656399	0.916168	0.849334	3.06347e-10	1.12756e-10	0.314202	0.115648
2011-NJ-QF-28	-62.0216	-55.6898	2012-01-18	5.47176	0.0515674	0.166227	0.638823	3.49548	0.0807226	0.0129156	0	0.346134	8.08711	0.419815	0.722927	23.061	0.264145	0.0711679	0.0670491	0.982679	0.956438	8.15073e-10	1.27145e-10	0.835972	0.130406
2011-NJ-QF-31	-61.5114	-47.4563	2012-01-26 12:00:00	2.12211	0.796414	0.143058	0.857418	1.81953	0.928851	0.148616	0.039457	0.107765	1.47785	0.139483	0.129364	3.91497	0.324086	0.0811649	0.0581693	0.832781	0.384843	9.3331e-11	1.46293e-12	0.0957241	0.00150044
2011-NJ-QF-33	-62.9473	-35.1319	2012-01-30	1.481	0.420179	0.164246	0.836789	1.23929	0.502133	0.0803413	0	0.0597199	1.21834	0.129739	0.131394	3.5481	0.114955	0.0115898	0.0541083	0.887769	0.367752	1.01709e-10	1.15891e-12	0.104317	0.00118863
2011-NJ-QF-34	-65.4857	-3.75741	2012-02-02	1.51925	0.000706928	0.127238	0.909346	1.38152	0.000777402	0.000124384	0	0.0900352	0.812695	0.163909	0.0772631	2.09679	0.126	0.0235868	0.0897384	0.999757	0.99908	3.01915e-08	4.04809e-09	30.9657	4.15188
2011-NJ-QF-35	-65.7956	42.5495	2012-02-04	2.09885	0.796487	0.15126	0.874694	1.83585	0.910589	0.145694	0.0363084	0.0785061	1.30736	0.0924401	0.126332	3.57486	0.129682	0.0119372	0.0716233	0.373429	0	9.47855e-12	0	0.00972159	0
2011-NJ-QF-36	-66.9838	66.6106	2012-02-07	2.58651	0.502797	0.0587765	0.534138	1.38156	0.941325	0.150612	0.0416078	0.196495	5.01633	0.420259	0.482582	7.37146	0.224996	0.0134516	0.0851932	0.335583	0	2.04578e-11	0	0.0209824	0
2011-NJ-QF-37	-69.1642	75.9411	2012-02-11	1.06828	0.626938	0.025232	0.875508	0.935289	0.716085	0.114574	0.00277321	0.0608619	0.786789	0.0640163	0.070537	2.21223	0.156323	0.0592787	0.0416949	0.461404	0	4.01201e-11	0	0.0411488	0
2011-NJ-QF-39	-69.2899	76.2517	2012-02-16	1.90873	0.608891	0.271807	0.874951	1.67004	0.695914	0.111346	0	0.0663555	1.2026	0.156032	0.0972711	3.20475	0.13539	0.0302837	0.068319	0.422665	0	3.04437e-11	0	0.0312243	0
2011-NJ-QF-40	-69.2241	75.9952	2012-02-19	1.50776	0.112713	0.273153	0.925671	1.39569	0.121763	0.0194822	0	0.0780039	0.705198	0.0802203	0.0614481	1.969	0.17912	0.0350581	0.0186184	0.901349	0.787894	3.94575e-10	1.44887e-10	0.404693	0.148602
2011-NJ-QF-42	-69.3419	75.1429	2012-02-25	1.39193	0.339175	0.131154	0.980034	1.36414	0.346085	0.0553736	0	0.0344687	0.371517	0.0708937	0.0251526	0.415591	0.134205	0.00965126	0.0219762	0.655222	0.351676	9.84407e-11	2.62028e-11	0.100965	0.0268746
2011-NJ-QF-43	-67.9816	73.7556	2012-02-28 12:00:00	3.25937	0.201332	0.368181	0.906352	2.95414	0.222134	0.0355415	0	0.0873978	1.5171	0.175846	0.144985	3.96516	0.214994	0.0716388	0.0736656	0.797127	0.580561	2.1512e-10	7.19866e-11	0.220636	0.0738324
2011-NJ-QF-44	-68.6912	75.6631	2012-03-03	1.96483	0.408662	0.0782799	0.686004	1.34788	0.595714	0.0953142	0	0.13846	2.6978	0.143137	0.276707	8.48786	0.19106	0.0141852	0.0447276	0.655354	0.342497	4.9753e-11	1.18469e-11	0.0510287	0.0121507
2011-NJ-QF-45	-68.8884	76.6967	2012-03-05	1.77602	0.224396	0.266409	0.921408	1.63644	0.243536	0.0389658	0	0.0569209	0.814139	0.130229	0.0705103	2.18325	0.178255	0.0197475	0.0731118	0.799235	0.615966	1.227e-10	4.44625e-11	0.125846	0.0456026
2011-NJ-QF-48	-37.9573	104.764	2012-03-13	1.52139	0.440339	0.301664	0.388262	0.590698	1.13413	0.18146	0.0748496	0.192768	3.92853	0.227241	0.363727	7.55742	0.27276	0.0373576	0.0578304	0.435406	0.34495	4.13571e-11	2.74317e-11	0.0424176	0.028135
2011-NJ-QF-49	-33.1926	112.346	2012-03-15	2.38198	0.410114	0.121809	0.377794	0.899899	1.08555	0.173688	0.0664741	0.380959	6.11729	0.411407	0.568605	11.4477	0.854466	0.0496379	0.106428	0.19668	0.0427841	2.44685e-11	4.39723e-12	0.0250959	0.00450998
2011-NJ-QF-50	-31.8981	115.653	2012-03-17	1.55587	0.311181	0.0679248	0.6289	0.978485	0.494802	0.0791684	0	0.242247	2.55567	0.43619	0.240783	4.62347	0.879626	0.0272985	0	0.45901	0.343067	1.75915e-10	1.08688e-10	0.180426	0.111474
2011-NJ-QF-52	-22.2837	113.536	2012-03-26	1.29816	0.553635	0.093032	0.70725	0.918122	0.782801	0.125248	0.014276	0.142264	1.86385	0.276838	0.175907	3.18719	1.65785	0.10641	0.354987	0	0	0	0	0	0
2011-NJ-QF-53	-4.14107	117.874	2012-03-29	3.2189	0.692932	0.112744	0.795226	2.55975	0.871365	0.139418	0.0295457	0.206328	2.96254	0.332316	0.289407	4.37096	1.67372	0.0380703	0.506965	0	0	0	0	0	0
2011-NJ-QF-54	23.656	125.163	2012-04-04	9.39528	0.600249	0.283217	0.787825	7.40184	0.761906	0.121905	0.0106734	0.578526	8.18059	0.707484	0.9255	11.2989	3.91139	0.0522241	0.572969	0.304868	0	1.78605e-10	0	0.183184	0
